# Supplementary material
Source: PubMed Central journal article supplement (PMC3796761)
Supplement: supp_est070_Richards_SupMat_TableS1_56haplo.pdf [file supp_est070_Richards_SupMat_TableS1_56haplo.pdf]

**Table S1.** Accession numbers and published sources for the 56 *Tursiops truncatus* haplotypes and *Stenella frontalis* outgroup used in the phylogenetic analysis

| Accession/publication | Geographic description of phylogenetic groups in Fig. 4 | Notes                              |
|-----------------------|---------------------------------------------------------|------------------------------------|
| KF366717              | IRL & CHS, NW Atl alongshore                            | H1 this study                      |
| KF366718              | IRL & CHS, NW Atl alongshore                            | H2 this study                      |
| KF366719              | IRL & CHS, NW Atl alongshore                            | H3 this study                      |
| KF366720              | IRL & CHS, NW Atl alongshore                            | H4 this study                      |
| KF366721              | IRL & CHS, NW Atl alongshore                            | H5 this study                      |
| JN596297              | IRL & CHS, NW Atl alongshore                            | sampled: Cuba                      |
| Hoelzel et al. 1998b  | IRL & CHS, NW Atl alongshore                            | 2 haplotypes                       |
| JN596316              | Caribbean, Gulf of Mexico                               |                                    |
| JN596311              | Caribbean, Gulf of Mexico                               |                                    |
| JN596310              | Caribbean, Gulf of Mexico                               |                                    |
| JN596309              | Caribbean, Gulf of Mexico                               |                                    |
| JN596301              | Caribbean, Gulf of Mexico                               |                                    |
| JN596294              | Caribbean, Gulf of Mexico                               |                                    |
| JN596293              | Caribbean, Gulf of Mexico                               |                                    |
| JN596286              | Caribbean, Gulf of Mexico                               |                                    |
| JN596281              | Caribbean, Gulf of Mexico                               |                                    |
| DQ118183              | Caribbean, Gulf of Mexico                               |                                    |
| AY997311              | Caribbean, Gulf of Mexico                               |                                    |
| AY997310              | Caribbean, Gulf of Mexico                               |                                    |
| AY997309              | Caribbean, Gulf of Mexico                               |                                    |
| AY997307              | Caribbean, Gulf of Mexico                               |                                    |
| AF378178              | Caribbean, Gulf of Mexico                               |                                    |
| AF378177              | Caribbean, Gulf of Mexico                               |                                    |
| AF155162              | Caribbean, Gulf of Mexico                               |                                    |
| AF155161              | Caribbean, Gulf of Mexico                               |                                    |
| AF155160              | Caribbean, Gulf of Mexico                               |                                    |
| Hoelzel et al. 1998b  | Caribbean, Gulf of Mexico                               | sampled: NW Atl alongshore         |
| Natoli et al. 2004    | Caribbean, Gulf of Mexico                               | 3 haplotypes                       |
| JN596321              | NW Atl offshore, Caribbean (worldwide form)             |                                    |
| JN596319              | NW Atl offshore, Caribbean (worldwide form)             |                                    |
| JN596318              | NW Atl offshore, Caribbean (worldwide form)             |                                    |
| JN596314              | NW Atl offshore, Caribbean (worldwide form)             |                                    |
| JN596305              | NW Atl offshore, Caribbean (worldwide form)             |                                    |
| JN596303              | NW Atl offshore, Caribbean (worldwide form)             |                                    |
| JN596300              | NW Atl offshore, Caribbean (worldwide form)             |                                    |
| JN596295              | NW Atl offshore, Caribbean (worldwide form)             |                                    |
| JN596289              | NW Atl offshore, Caribbean (worldwide form)             |                                    |
| JN596288              | NW Atl offshore, Caribbean (worldwide form)             |                                    |
| JN596287              | NW Atl offshore, Caribbean (worldwide form)             |                                    |
| JN596283              | NW Atl offshore, Caribbean (worldwide form)             |                                    |
| DQ118184              | NW Atl offshore, Caribbean (worldwide form)             |                                    |
| DQ118182              | NW Atl offshore, Caribbean (worldwide form)             |                                    |
| Hoelzel et al. 1998b  | NW Atl offshore, Caribbean (worldwide form)             | 12 haplotypes                      |
| GQ504173              |                                                         | <i>Stenella frontalis</i> outgroup |
